# Supplementary material for: Adsorptive catalysis of hierarchical porous heteroatom-doped biomass: from recovered heavy metal to efficient pollutant decontamination
Source: Royal Society of Chemistry journal article supplement (doi:10.1039/c8ta03714k), 2018-01-01
Supplement: c8ta03714k1.pdf [file c8ta03714k1.pdf]

## Supporting Information

### **Title: Adsorptive Catalysis of Hierarchical Porous Heteroatoms-Doped Biomass: From Recovered Heavy Metal to Efficient Pollutant Decontamination**

*Jing Wang,<sup>a</sup> Qingfeng Yang,<sup>a</sup> Weixia Yang,<sup>a</sup> Hanna Pei,<sup>a</sup> Liang Zhang,<sup>a</sup> Tianshu Zhang,<sup>a</sup> Na Hu,<sup>b</sup> Yourui Suo,<sup>b</sup> Jianlong Wang<sup>a\*</sup>*

<sup>a</sup> College of Food Science and Engineering, Northwest A&F University, Yangling, 712100, Shaanxi, China.

<sup>b</sup> Northwest Institute of Plateau Biology, Chinese Academy of Sciences, Xining, 810008, Qinghai, P. R. China.

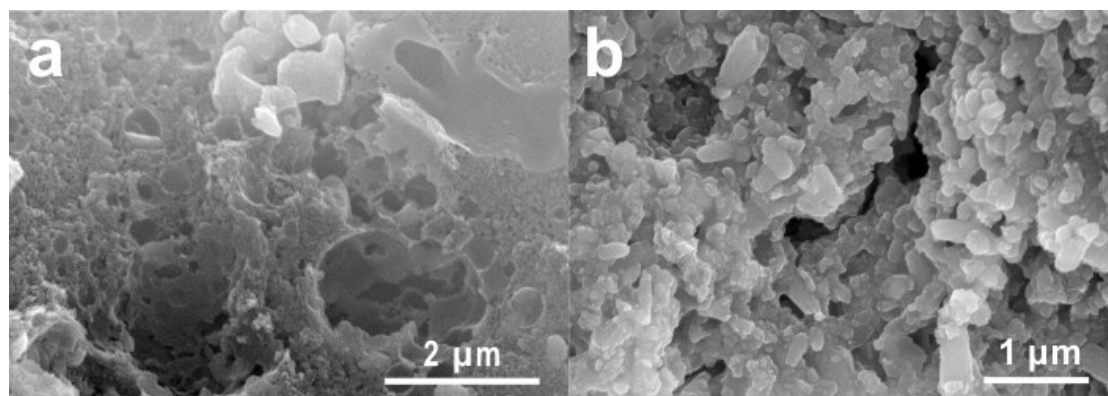

**Figure S1.** SEM image of the prepared a) CK and b) CS.

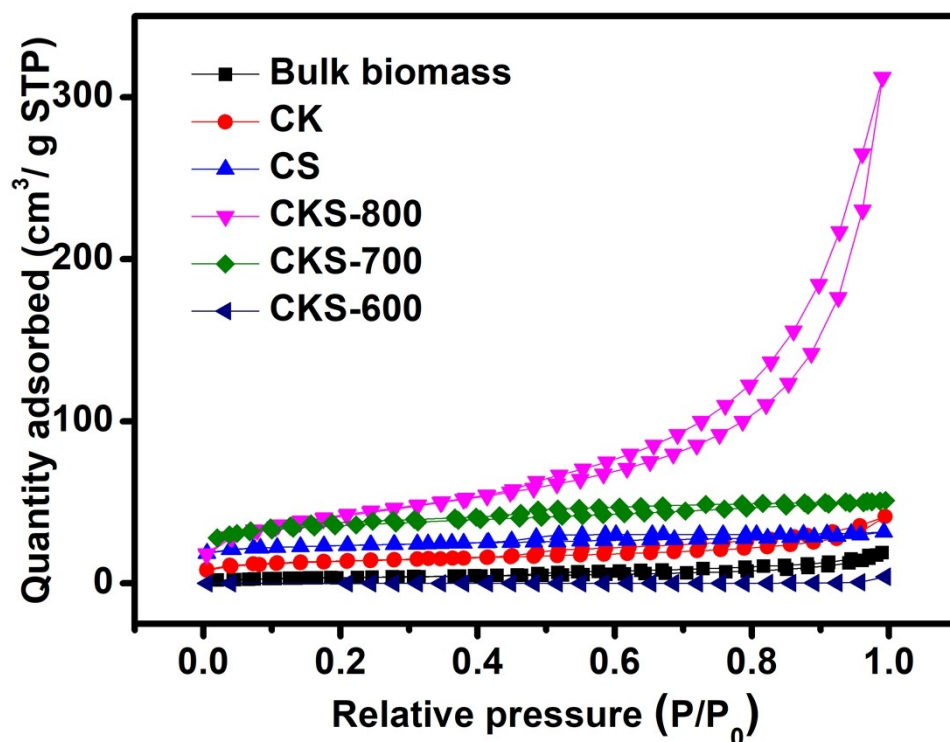

Figure S2. N<sub>2</sub> sorption isotherms of different biomass composites.

Table S1. Physico-chemical properties of the hierarchical porous carbons.

| materials    | textural properties                                   |                                              |                      | element composition (wt %) |      |       |      |
|--------------|-------------------------------------------------------|----------------------------------------------|----------------------|----------------------------|------|-------|------|
|              | S <sub>BET</sub><br>(m <sup>2</sup> g <sup>-1</sup> ) | pore                                         | pore size            | C                          | N    | O     | S    |
|              |                                                       | volume<br>(cm <sup>3</sup> g <sup>-1</sup> ) | distribution<br>(nm) |                            |      |       |      |
| Bulk biomass | 12.62                                                 | 0.031                                        | 1.152                | 63.43                      | 1.53 | 27.46 | -    |
| CK           | 47.78                                                 | 0.062                                        | 5.15                 | 64.15                      | 1.68 | 26.03 | -    |
| CS           | 79.77                                                 | 0.049                                        | 2.44                 | 66.97                      | 1.72 | 12.65 | 5.04 |
| CKS-600      | 66.49                                                 | 0.059                                        | 4.08                 | 63.44                      | 2.62 | 12.17 | 4.62 |
| CKS-700      | 111.76                                                | 0.079                                        | 2.83                 | 72.11                      | 1.17 | 8.52  | 7.13 |
| CKS-800      | 152.08                                                | 0.481                                        | 12.54                | 78.18                      | 1.05 | 5.89  | 9.42 |
| CKS-Cu       | 154.64                                                | 0.431                                        | 11.37                | -                          | -    | -     | -    |
| Regenerated  |                                                       |                                              |                      |                            |      |       |      |
| CKS          | 137.47                                                | 0.293                                        | 8.36                 | -                          | -    | -     | -    |
| CKS-Cu after | 147.15                                                | 0.395                                        | 8.23                 | -                          | -    | -     | -    |

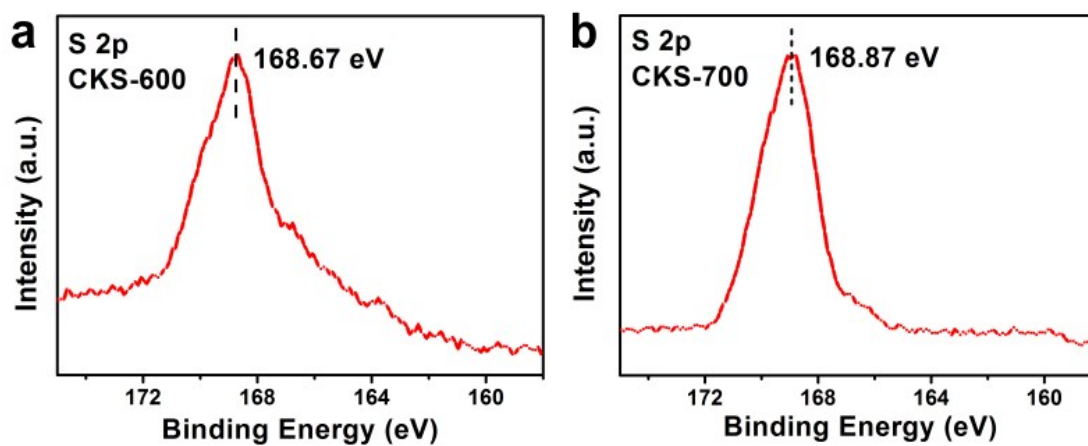

Figure S3. XPS spectra S 2p signal deconvolution of CKS-600 and CKS-700.

#### Results

|                            | Mean (mV)    | Area (%) | St Dev (mV) |
|----------------------------|--------------|----------|-------------|
| Zeta Potential (mV): 8.24  | Peak 1: 8.24 | 100.0    | 3.87        |
| Zeta Deviation (mV): 3.87  | Peak 2: 0.00 | 0.0      | 0.00        |
| Conductivity (mS/c... 1.35 | Peak 3: 0.00 | 0.0      | 0.00        |

Result quality Good

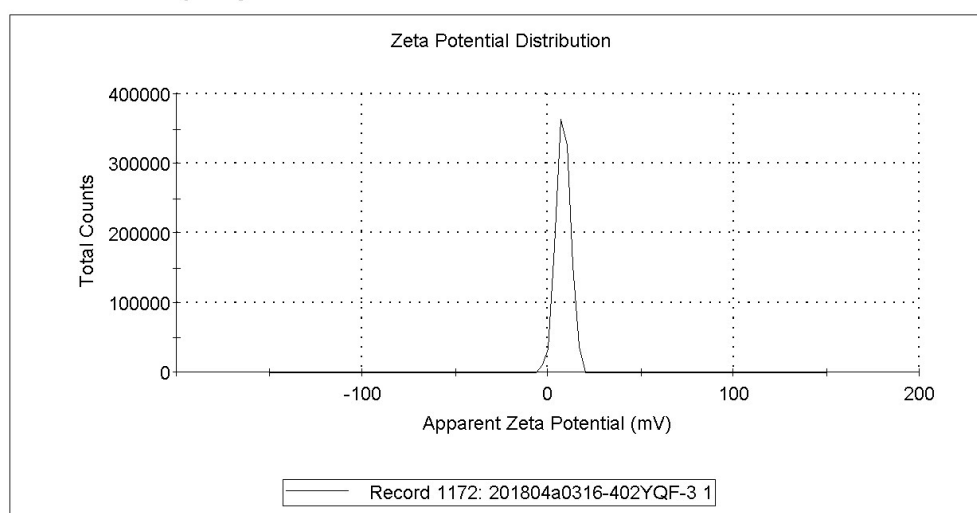

Figure S4. Zeta potential of hierarchical porous CKS biomass.

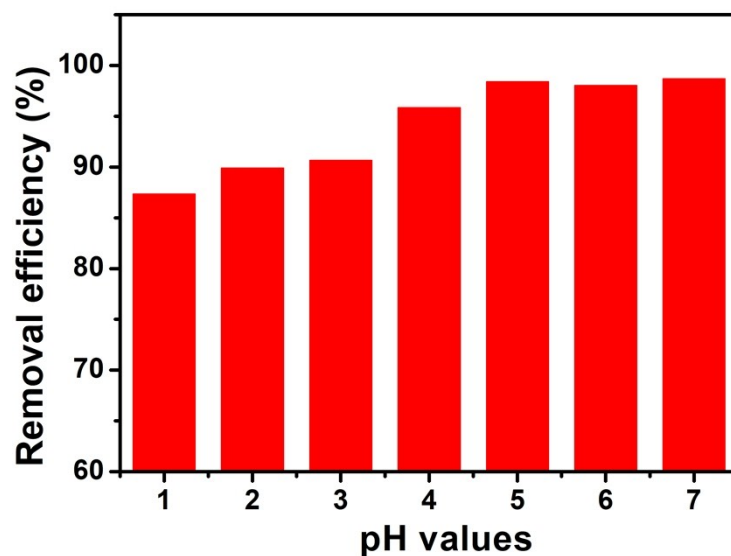

**Figure S5.** Removal efficiency of CKS toward Cu(II) under different pH values.

**Table S2.** Initial (before adsorption) and final (after adsorption) pH values

|         | pH values |      |      |      |      |      |
|---------|-----------|------|------|------|------|------|
| initial | 1.21      | 2.32 | 3.07 | 4.01 | 5.20 | 6.14 |
| final   | 1.18      | 2.24 | 2.94 | 3.89 | 5.01 | 5.87 |

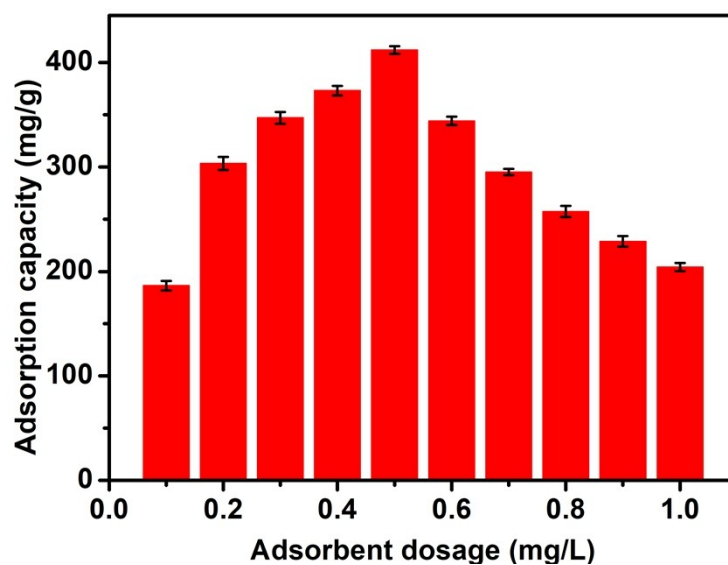

**Figure S6.** Adsorption capacities of CKS toward 300 ppm of Cu(II) under different adsorbent dosage.

**Table S3.** Kinetic parameters of metal ions adsorption on CKS

| Single ions      | pesudo-second-order           |                     |                               |       |                    |
|------------------|-------------------------------|---------------------|-------------------------------|-------|--------------------|
|                  | $q_{e, \text{exp}}$<br>(mg/g) | $k_2$<br>(g/mg min) | $q_{e, \text{cal}}$<br>(mg/g) | $R^2$ | Fitting equation   |
| Cu <sup>2+</sup> | 412.10                        | 0.0002              | 414.14                        | 0.997 | $t/q=0.029+0.002t$ |
| Ni <sup>2+</sup> | 312.88                        | 0.0009              | 322.58                        | 0.996 | $t/q=0.011+0.003t$ |
| Pb <sup>2+</sup> | 267.53                        | 0.0003              | 264.12                        | 0.998 | $t/q=0.047+0.004t$ |

**Table S4.** Isotherm parameters of metal ions adsorption on CKS

| single ions      | $q_{m, \text{exp}}$<br>(mg/g) | Langmuir isotherm model |                               |       |                          | Freundlich isotherm model |        |        |
|------------------|-------------------------------|-------------------------|-------------------------------|-------|--------------------------|---------------------------|--------|--------|
|                  |                               | $k_L$                   | $q_{m, \text{cal}}$<br>(mg/g) | $R^2$ | Fitting equation         | $K_F$<br>(mg/g)           | n      | $R^2$  |
| Cu <sup>2+</sup> | 1356.62                       | 0.0071                  | 1366.67                       | 0.991 | $C_e/q_e=0.1+0.0007C_e$  | 110.58                    | 2.4888 | 0.9209 |
| Ni <sup>2+</sup> | 1122.63                       | 0.0104                  | 1250.21                       | 0.994 | $C_e/q_e=0.08+0.0008C_e$ | 228.40                    | 4.0766 | 0.9432 |
| Pb <sup>2+</sup> | 612.31                        | 0.0072                  | 619.23                        | 0.996 | $C_e/q_e=0.22+0.0016C_e$ | 65.75                     | 2.8353 | 0.9723 |

**Table S5.** XPS analysis of Surface Functionality

| content/functionality (at.%) | CKS   | CKS-Pb | CKS-Cu |
|------------------------------|-------|--------|--------|
| total oxygen content         | 43.02 | 19.58  | 15.37  |
| total sulfur content         | 10.73 | 1.63   | 1.41   |
| O-M                          | 7.18  | 9.02   | 9.17   |
| O=C-O                        | 4.45  | 3.82   | 2.38   |

**Table S6.** Estimated total cost for preparing 1 g of nanoadsorbents and corresponding adsorption capacities.

| classification                  | adsorbent                                             | material                      | amount used                                 | unit cost (dollar) | Cost (dollar) | total cost (dollar) | Cu <sup>2+</sup> adsorption capacity | k <sub>2</sub> (g/mg min)                                                     | ref |
|---------------------------------|-------------------------------------------------------|-------------------------------|---------------------------------------------|--------------------|---------------|---------------------|--------------------------------------|-------------------------------------------------------------------------------|-----|
| metal oxide-based nanoadsorbent | Hematite ( $\alpha$ -Fe <sub>2</sub> O <sub>3</sub> ) | FeCl <sub>3</sub>             | 2.7                                         | 6.52               | 17.60         | <b>21.75</b>        | 84.46                                | 0.0025<br>(C <sub>Cu<sup>2+</sup></sub> , initial = 3.79 mg L <sup>-1</sup> ) | 1   |
|                                 |                                                       | DI water                      | 500                                         | 0.0226             | 11.3          |                     |                                      |                                                                               |     |
|                                 |                                                       | HCl                           | 0.05                                        | 0.549              | 0.027         |                     |                                      |                                                                               |     |
|                                 | $\gamma$ -Fe <sub>2</sub> O <sub>3</sub>              | DI water                      | 200                                         | 0.0226             | 4.52          | <b>19.01</b>        | 26.8                                 | -                                                                             | 2   |
|                                 |                                                       | FeCl <sub>3</sub>             | 5.2                                         | 6.52               | 33.90         |                     |                                      |                                                                               |     |
|                                 |                                                       | FeCl <sub>2</sub>             | 2                                           | 3.18               | 6.36          |                     |                                      |                                                                               |     |
|                                 |                                                       | NH <sub>4</sub> OH            | 1.5                                         | 0.0826             | 0.1239        |                     |                                      |                                                                               |     |
|                                 |                                                       | Tetramethylammonium hydroxide | 1                                           | 0.2264             | 0.2264        |                     |                                      |                                                                               |     |
|                                 | $\alpha$ -MnO <sub>2</sub> (OMS-1)                    | 99% Octyl ether               | N/A                                         | N/A                |               |                     |                                      |                                                                               |     |
|                                 |                                                       | NaSO <sub>4</sub>             | 0.15 M, 250 mL                              | 0.1042             | 0.56          |                     |                                      |                                                                               |     |
|                                 |                                                       | MnSO <sub>4</sub>             | C <sub>Mn<sup>2+</sup></sub> =0.6 M, 400 mL | 0.273              | 11.07         | <b>1.84</b>         | 57.6                                 | -                                                                             | 3   |
|                                 |                                                       | NaOH                          | 5 M, 400 mL                                 | 0.1886             | 15.09         |                     |                                      |                                                                               |     |
|                                 |                                                       | MgCl <sub>2</sub>             | 1M                                          | 0.537              | 12.24         |                     |                                      |                                                                               |     |
|                                 |                                                       | DI water                      | 250                                         | 0.0226             | 5.65          | <b>10.35</b>        | 83.2                                 | -                                                                             | 4   |
|                                 |                                                       | 65% HNO <sub>3</sub>          | 11.5                                        | 0.41               | 2.46          |                     |                                      |                                                                               |     |
| TiO <sub>2</sub> monolith       | KMnO <sub>4</sub>                                     | 2.1                           | 1.592                                       | 3.34               |               |                     |                                      |                                                                               |     |
|                                 | TiO <sub>2</sub>                                      | 4.6                           | 8.68                                        | 39.93              | <b>18.68</b>  | 398.72              | -                                    | 5                                                                             |     |
|                                 | HCl                                                   | 1M, 1000                      | 0.046                                       | 46                 |               |                     |                                      |                                                                               |     |
|                                 | 5 M, tetrabutylammonium                               | N/A                           | 8.08                                        | N/A                |               |                     |                                      |                                                                               |     |
| carbonhydrate                   | TEMPO                                                 | CNC                           | 1 g                                         | 0.3                | 0.3           | <b>2.72</b>         | 268.2                                | -                                                                             | 6   |

|                            |                                       |                          |               |        |            |              |                                                              |                                                              |    |
|----------------------------|---------------------------------------|--------------------------|---------------|--------|------------|--------------|--------------------------------------------------------------|--------------------------------------------------------------|----|
|                            | oxidized CNC                          |                          |               |        |            |              |                                                              |                                                              |    |
|                            |                                       | TEMPO                    | 0.059         | 0.57   | 0.33       |              |                                                              |                                                              |    |
|                            |                                       | NaBr                     | 0.325 g       | 0.112  | 0.04       |              |                                                              |                                                              |    |
|                            |                                       | NaClO                    | 7.1 mL        | 0.19   | 1.35       |              |                                                              |                                                              |    |
|                            |                                       | Methanol                 | 11 mL         | 0.063  | 0.7        |              |                                                              |                                                              |    |
|                            |                                       | NaOH                     | N/A           | 0.008  | N/A        |              |                                                              |                                                              |    |
|                            |                                       | HCl                      | N/A           | 0.01   | N/A        |              |                                                              |                                                              |    |
| based-adsorbent            | Succinic anhydride/CNC                | CNC                      | 1 g           | 0.3    | 0.3        | <b>0.78</b>  | 121.6                                                        | -                                                            | 6  |
|                            |                                       | Succinic anhydride       | 0.6 g         | 0.26   | 0.16       |              |                                                              |                                                              |    |
|                            |                                       | Sodium hydrogencarbonate | N/A           | 0.018  | N/A        |              |                                                              |                                                              |    |
|                            |                                       | N,N-dimethylacetamide    | 5 mL          | 0.063  | 0.32       |              |                                                              |                                                              |    |
| carbon-based nanoadsorbent | MWCNT                                 |                          |               |        |            | <b>42.35</b> | 24.49                                                        | -                                                            | 7  |
|                            | SWCNT                                 |                          |               |        |            | <b>676</b>   | 24.29                                                        | -                                                            | 8  |
|                            | MWCNT, carboxylic acid functionalized |                          |               |        |            | <b>116.5</b> | 77                                                           | -                                                            | 9  |
|                            | Graphene oxide                        |                          |               |        |            | <b>2215</b>  | 294                                                          | 0.016<br>( $C_{Cu^{2+}, initial} = 5 \text{ mg L}^{-1}$ )    | 10 |
| biomass-based adsorbent    | Soy protein-based PEI hydrogel        | soy protein isolate      | 1 g           | 0.06   | 0.06       | <b>1.78</b>  | 136.2                                                        | 0.0046<br>( $C_{Cu^{2+}, initial} = 100 \text{ mg L}^{-1}$ ) | 11 |
|                            |                                       | PEI (Mw % ca. 25000)     | 1 g           | 1.72   | 1.72       |              |                                                              |                                                              |    |
|                            |                                       | epichlorohydrin          | N/A           |        |            |              |                                                              |                                                              |    |
|                            |                                       | soybean dregs-PAA        | Soybean dregs | 0.60 g | N/A        | <b>0.11</b>  | 75.4                                                         | 0.0333<br>( $C_{Cu^{2+}, initial} = 150 \text{ mg L}^{-1}$ ) | 12 |
|                            | tea waste                             |                          |               |        | <b>N/A</b> | 48           | 0.0133<br>( $C_{Cu^{2+}, initial} = 200 \text{ mg L}^{-1}$ ) | 13                                                           |    |
|                            | Activated slag                        |                          |               |        | <b>N/A</b> | 30           | -                                                            | 14                                                           |    |

|               |                   |     |                      |                      |              |         |                                                              |           |
|---------------|-------------------|-----|----------------------|----------------------|--------------|---------|--------------------------------------------------------------|-----------|
| Sewage sludge |                   |     |                      |                      | N/A          | 83      | -                                                            | 15        |
| CKS           | soybean dregs     | 1 g | $8.3 \times 10^{-7}$ | $8.3 \times 10^{-7}$ | <b>0.041</b> | 1366.67 | 0.0002<br>( $C_{Cu^{2+}, initial} = 100 \text{ mg L}^{-1}$ ) | This work |
|               | CaSO <sub>4</sub> | 1 g | 0.022                | 0.022                |              |         |                                                              |           |
|               | oxalate           | 1 g | 0.019                | 0.019                |              |         |                                                              |           |

Detailed information: CNC, cellulose nanocrystals; DNPH, 2,4-Dinitrophenylhydrazine; PEI, polyethylenimine; PAA, poly(acrylic acid)

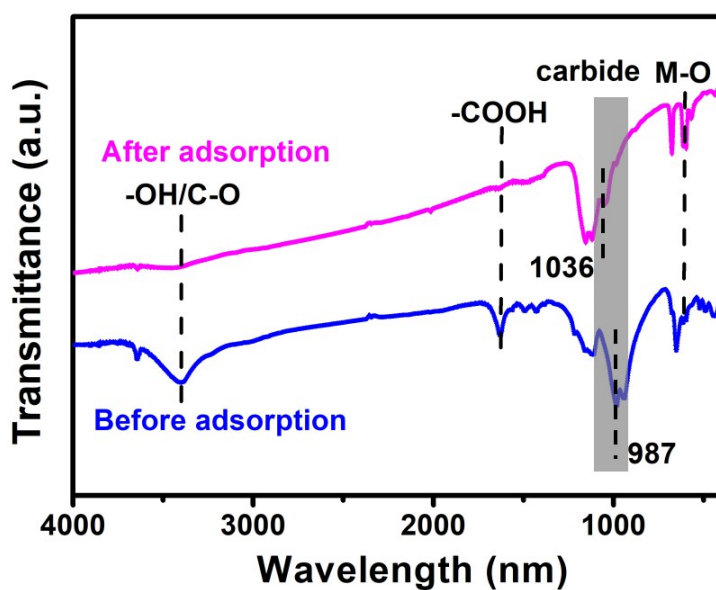

Figure S7. FT-IR spectra of CKS before and after Cu(II) adsorption.

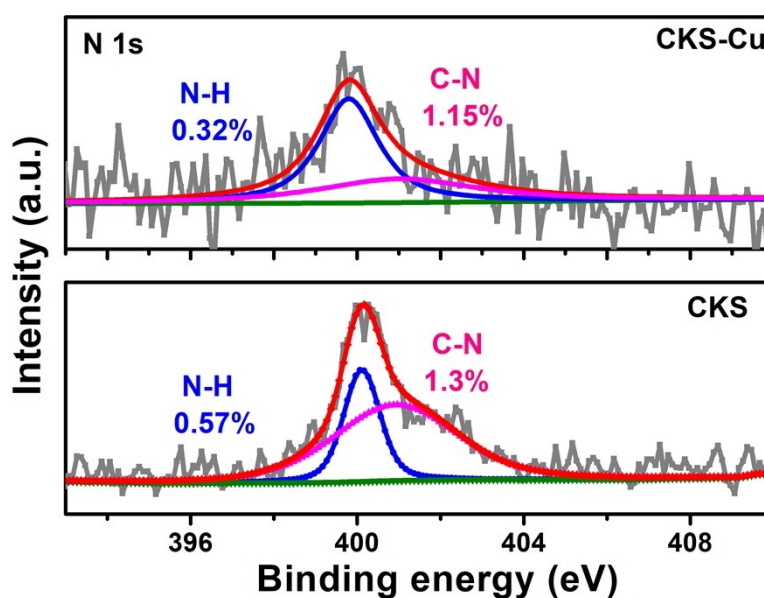



**Figure S8.** XPS detailed studies of N 1s signal deconvolution of CKS biosorbent before and after Cu<sup>2+</sup> adsorption.

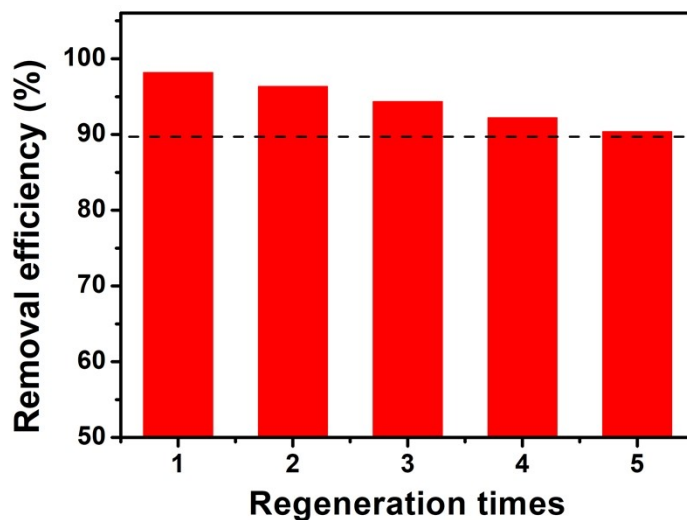

**Figure S9.** Cu(II) removal efficiency and recycling of CKS biomass adsorbents. The initial concentration of Cu(II) is 10 mg L<sup>-1</sup>.

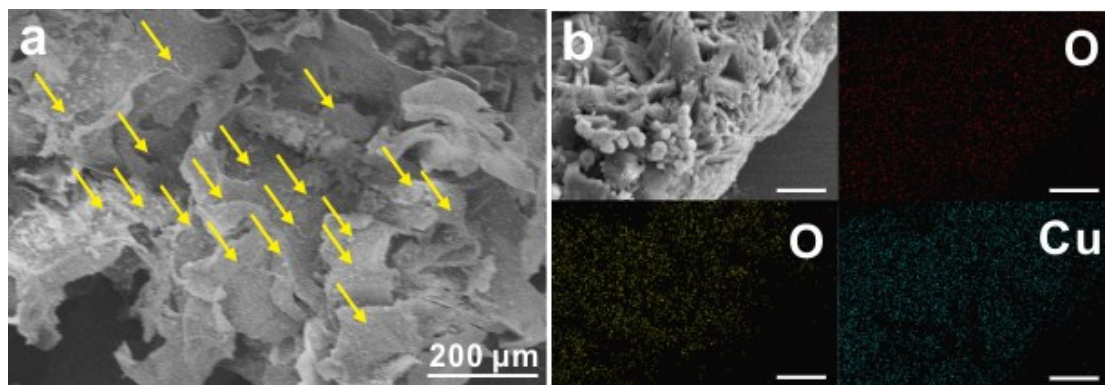

**Figure S10.** a) SEM image of CKS, the arrows label the Cu nanoparticles on the surface of CKS. b) Mapping images of CKS-Cu, the scale bar is 2 μm.

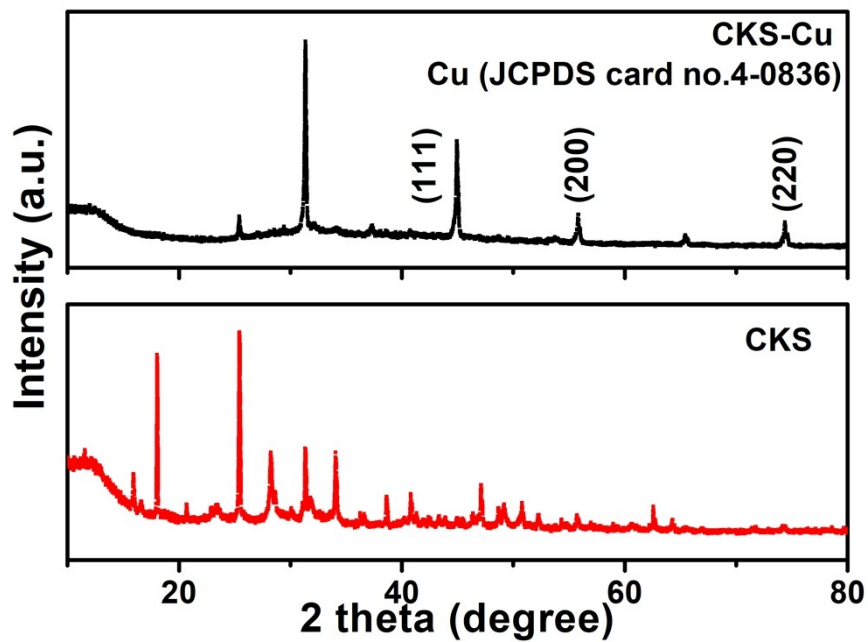

Figure. S11 XRD patterns of CKS before and after  $\text{Cu}^{2+}$  adsorption.

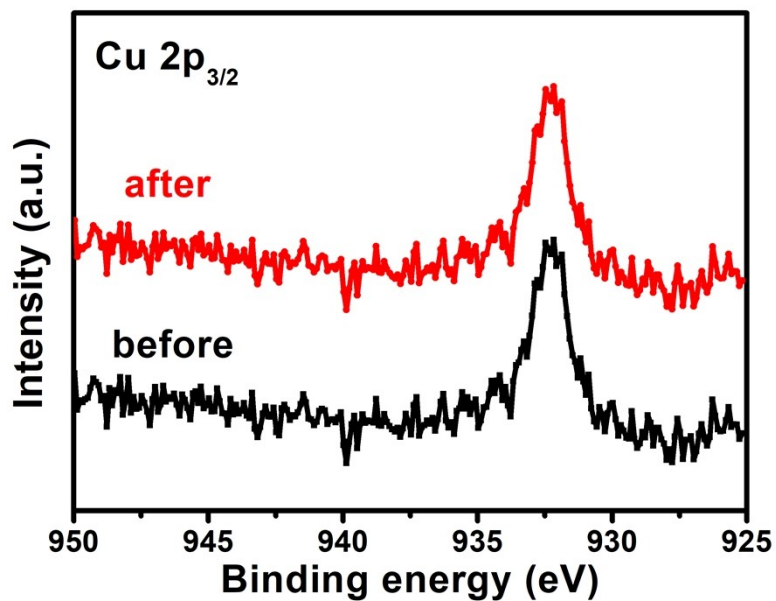

Figure. S12 XPS patterns of Cu 2p of CKS-Cu before and after  $\text{Cr}^{\text{VI}}$  reduction.

**Reference:**

- [1] Y.-H. Chen, F.-A. Li, *J. Colloid Interface Sci.*, 2010, **347**, 277-281.
- [2] J. Hu, G. H. Chen, I. M. C. Lo, *Water Res.*, 2005, **39**, 4528-4536.

- [3] J. Pakarinen, R. Koivula, M. Laatikainen, K. Laatikainen, E. Paatero, R. Harjula, *J. Hazard. Mater.*, 2010, **180**, 234-240.
- [4] R. Koivulaa, J. Pakarinenb, M. Siveniusb, K. Sirolab, R. Harjulaa, E. Paaterob, *Sep. Purif. Technol.* 2009, **70**, 53-57.
- [5] W. Zhao, I. W. Chen, F. Xu, F. Huang, *J. Mater. Chem. A*, 2017, **5**, 15724-15729.
- [6] S. Hokkanen, A. Bhatnagar, M. Sillanpää, *Water Res.* 2016, **91**, 156-173.
- [7] Y. H. Li, J. Ding, Z. Luan, Z. Di, Y. Zhu, C. Xu, B. Wei, *Carbon*, 2003, **41**, 2787-2792.
- [8] O. Moradi, K. Zare, M. Monajjemi, M. Yari, H. Aghaie, *Fullerenes, Nanotubes, and Carbon Nanostructures*, 2010, **18**, 285-302.
- [9] J. Liu, D. Su, J. Yao, Y. Huang, Z. Shao, X. Chen, *J. Mater. Chem. A*, 2017, **5**, 4163-4171.
- [10] R. Sitko, E. Turek, B. Zawisza, E. Malicka, E. Talik, J. Heimann, R. Wrzalik, *Dalton Trans.*, 2013, **42**, 5682-5689.
- [11] J. Liu, D. Su, J. Yao, Y. Huang, Z. Shao, X. Chen, *J. Mater. Chem. A*, 2017, **5**, 4163-4171.
- [12] M. Zhang, L. Song, H. Jiang, S. Li, Y. Shao, J. Yang, J. Li, *J. Mater. Chem. A*, 2017, **5**, 3434-3446.
- [13] B. M. Amarasinghe, P. K., W., R. A. Williams, *Chem. Eng. J.*, 2007, **132**, 299-309.
- [14] V. K. Gupta, *Ind. Eng. Chem. Res.*, 1998, **37**, 192-202.
- [15] S. Rio, C. Faur-Brasquet, L. Le Coq, P. Courcoux, P. Le Cloirec, *Chemosphere*, 2005, **58**, 423-437.
